# Supplementary material for: The effect of polymer solubilizing side-chains on solar cell stability
Source: Royal Society of Chemistry journal article supplement (doi:10.1039/c5cp01158b), 2015-01-01
Supplement: c5cp01158b1.pdf [file c5cp01158b1.pdf]

## The Effect of Polymer Solubilizing Side-Chains on Solar Cell Stability

G.E. Morse,<sup>a\*</sup> A. Tournebize,<sup>b,c</sup> Agnès Rivaton,<sup>b</sup> Thomas Chassé,<sup>c</sup> Christine Taviot-Gueho,<sup>d</sup> Nicolas Blouin,<sup>a</sup> Owen R. Lozman,<sup>a</sup> and Steven Tierney<sup>a</sup>

### Supporting Information

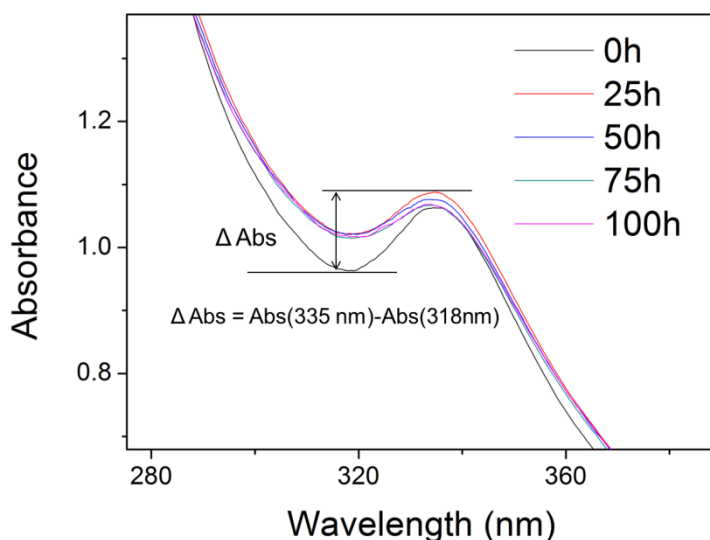

Figure S1. Measure of the PCBM UV-Vis changes is schematically shown.

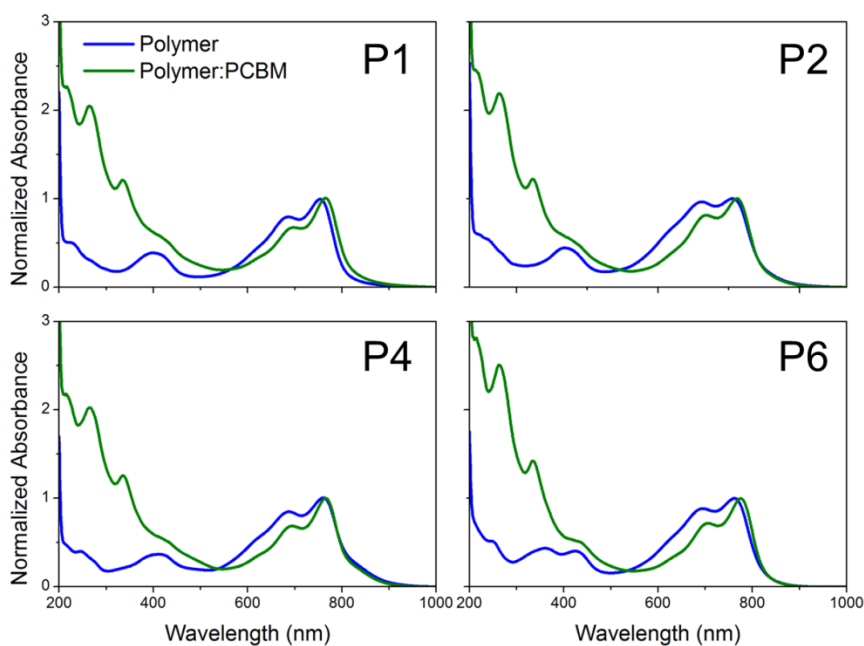

Figure S2. Absorbance of the polymers in pure polymer films (blue) or blended with PCBM (green).

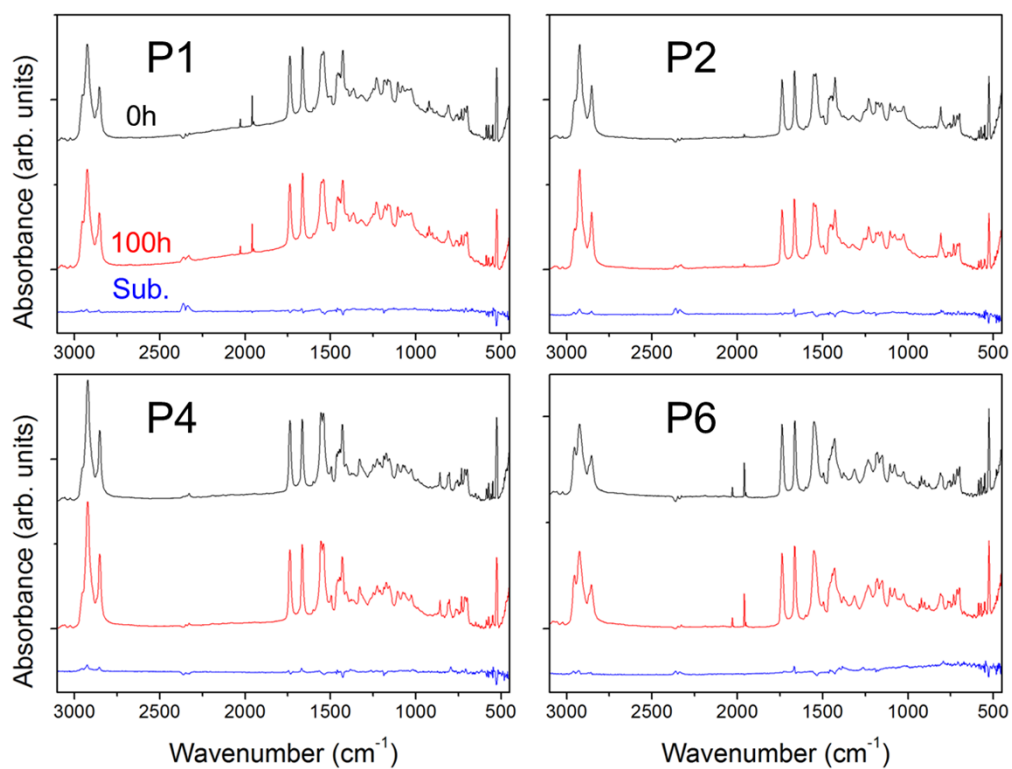

Figure S3. Direct and subtracted FTIR spectra of EP1, 2, 4 and 6 blends before and after 100h of irradiation.

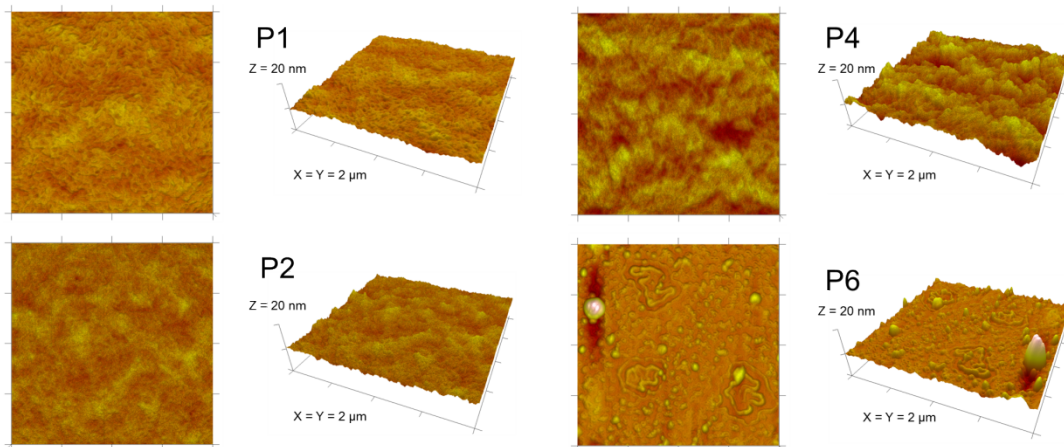

Figure S4. AFM images of pristine P1, P2, P4 and P6 blends with PCBM.

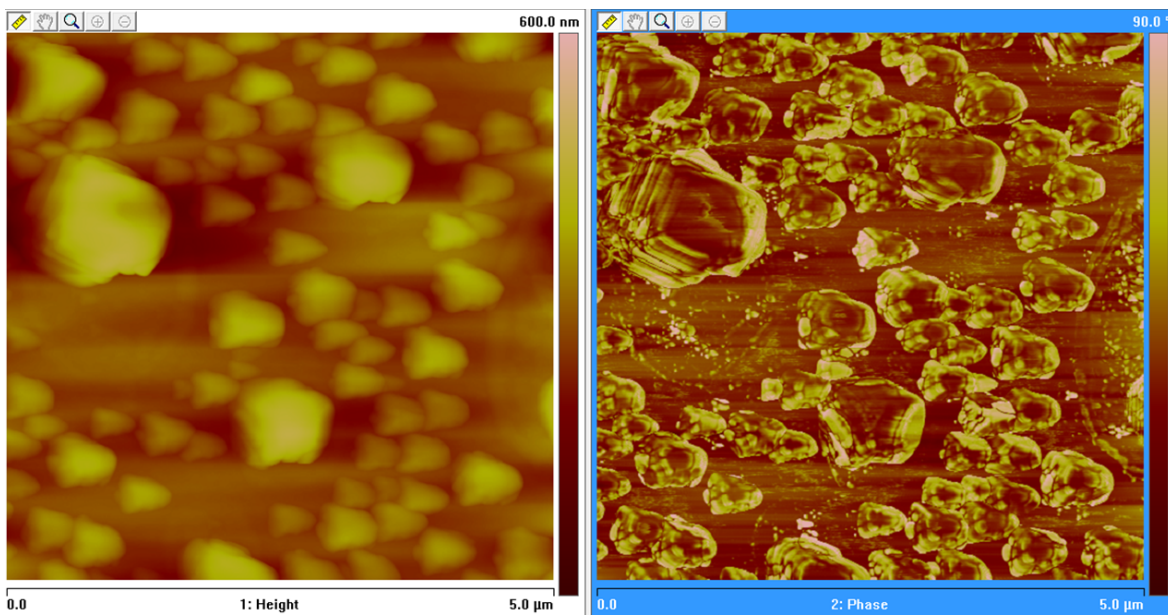

Figure S5. Height and phase images of the P6 surface after 100h of ageing.

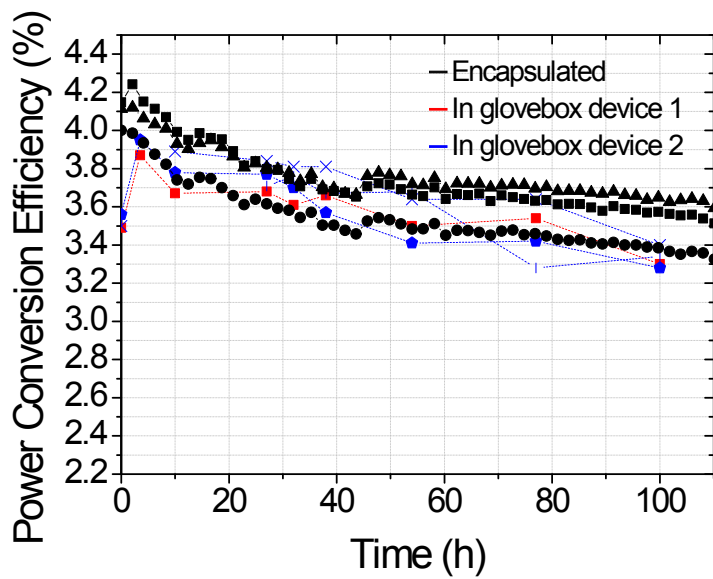

Figure S6: Degradation comparison between AM1.5 ageing on device stored in a N<sub>2</sub> glovebox and encapsulated devices stored outside a glovebox.

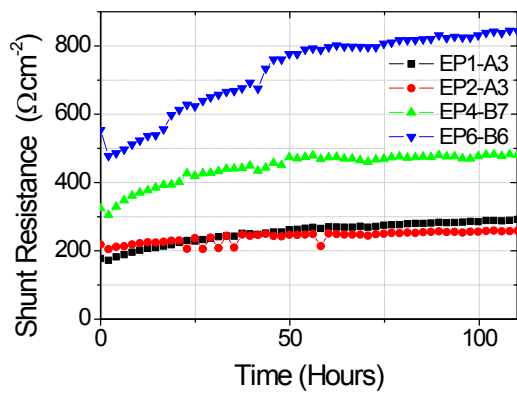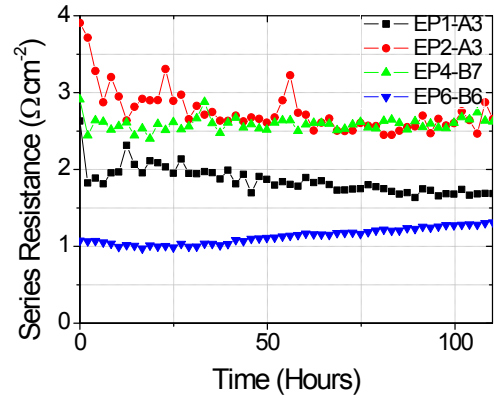

Figure S7: Series and Shunt resistance changes of P1-P6 as a function of hours of accumulated AM1.5 simulated solar irradiance.
